# Supplementary material
Source: PubMed Central journal article supplement (PMC2670107)
Supplement: M808694200_1.pdf [file M808694200_1.pdf]

# Supplemental Data

Supplemental Fig. S1

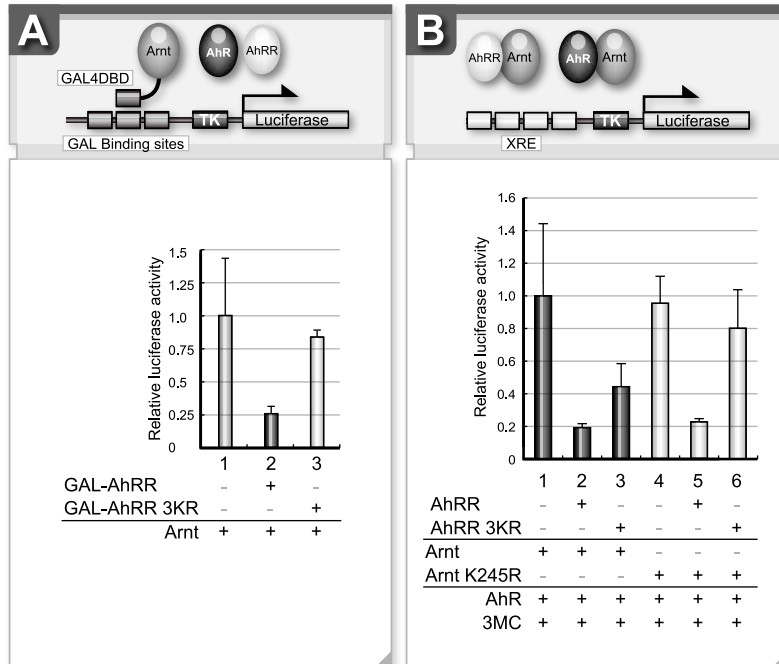

## FIGURE LEGENDS

FIGURE S1. A, HeLa cells were transiently transfected with the expression plasmids for GAL4DBD-AhRR WT or 3KR, Arnt, and GAL-TK-Luc reporter gene containing three GAL binding sites. Cell extracts were prepared 48 h after transfection and used for luciferase assays. The fold repression is relative to the reporter gene alone. B, HeLa cells were transiently transfected with the expression plasmids for Arnt WT or K245R, AhRR WT, 3KR or AhR, and 4xXRE-TK-Luc reporter gene containing four XRE sequences. After 48 h of transfection, cells were treated with 2 mM of 3MC or Me2SO; 24 h later, cell extracts were prepared and used for luciferase assays. Luciferase activities are shown as values relative to lane 1.
